# background correlations

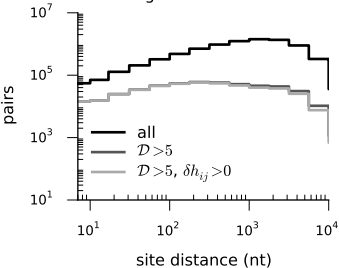

Source: https://storage.googleapis.com/plos-corpus-prod/10.1371/journal.pcbi.1003860/1/pcbi.1003860.s003.pdf
